# Supplementary material for: Microbial Similarity between Students in a Common Dormitory Environment Reveals the Forensic Potential of Individual Microbial Signatures
Source: PubMed Central journal article supplement (PMC6667619; doi:10.1128/mbio.01054-19), 2019-07-30

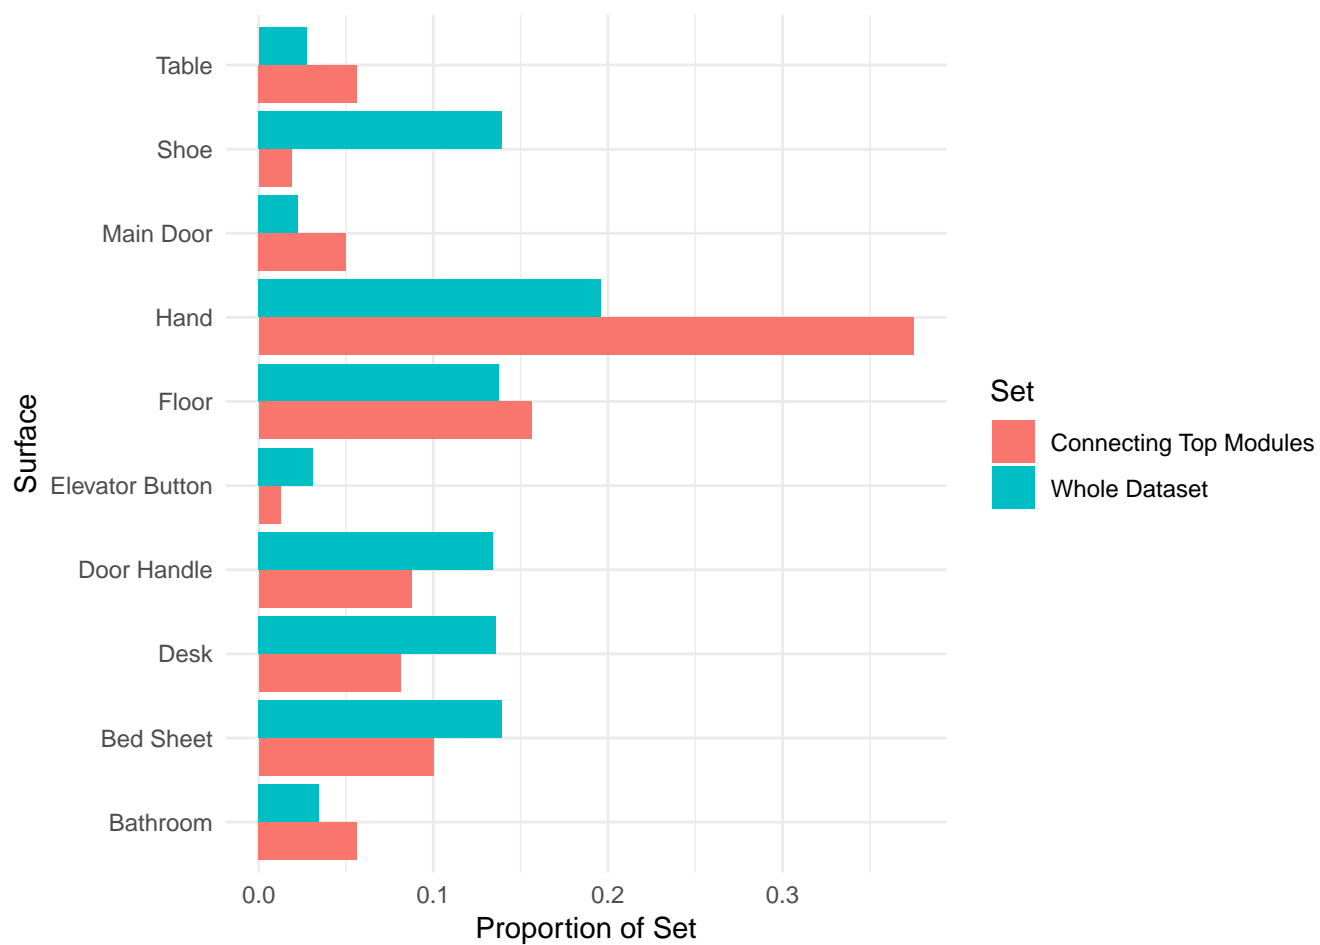

Supplement: mBio.01054-19-sf006.pdf [file mBio.01054-19-sf006.pdf]
